# Supplementary material for: Generalised analytical method unravels framework-dependent kinetics of adsorption-induced structural transition in flexible metal–organic frameworks
Source: Springer Nature journal article supplement (doi:10.1038/s41467-023-42448-3), 2023-11-08
Supplement: 41467_2023_42448_MOESM3_ESM.pdf [file 41467_2023_42448_MOESM3_ESM.pdf]

**Title:** Supplementary Video 1.

**Description:** In situ optical microscopy movie of ELM-11 particles during the introduction of CO<sub>2</sub> at 0.8 kPa s<sup>-1</sup> and ~297 K.

**Title:** Supplementary Video 2.

**Description:** The same video as Supplementary Video 1, but in each frame, the pixels that changed from the first frame (0 s) are coloured red.

**Title:** Supplementary Video 3.

**Description:** Schematic movement of the structural transition mechanism of CO<sub>2</sub> gate adsorption on ELM-11.

**Title:** Supplementary Video 4.

**Description:** In situ optical microscopy movie of MIL-53(A1) particles during the introduction of CO<sub>2</sub> at 0.8 kPa s<sup>-1</sup> and ~297 K.

**Title:** Supplementary Video 5.

**Description:** The same video as Supplementary Video 4, but in each frame, the pixels that changed from the first frame (0 s) are coloured red.

**Title:** Supplementary Video 6.

**Description:** In situ optical microscopy movie of CuFB particles during the introduction of CO<sub>2</sub> at 0.8 kPa s<sup>-1</sup> and ~297 K.

**Title:** Supplementary Video 7.

**Description:** The same video as Supplementary Video 6, but in each frame, the pixels that changed from the first frame (0 s) are coloured red.
